# Supplementary material
Source: PubMed Central journal article supplement (PMC6028185)
Supplement: NIHMS931713-supplement-Supplemental.pdf [file NIHMS931713-supplement-Supplemental.pdf]

## Supplemental Figures and Tables

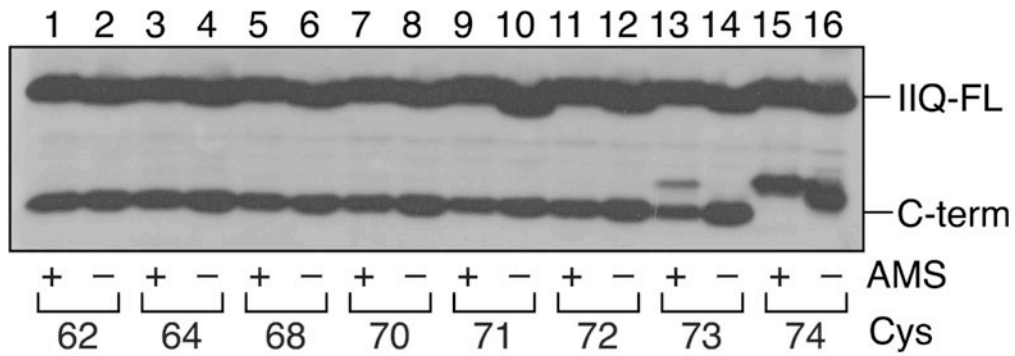

**Supplemental Fig 1.** Identification of cleavage site by AMS modification of mono-Cys derivatives of SpoIIQ. Numbers at the bottom indicate position where cysteine was introduced. Whole cell lysates from  $t_4$  of sporulation were incubated with (odd numbered lanes) or without (even numbered lanes) AMS at 37°C for 1 hour, and analyzed by Western blotting using anti-SpoIIQ antiserum. The size shift in the C-terminal fragment following AMS treatment (lane 13 and lane 15) indicates that the cysteine residue is within this fragment.

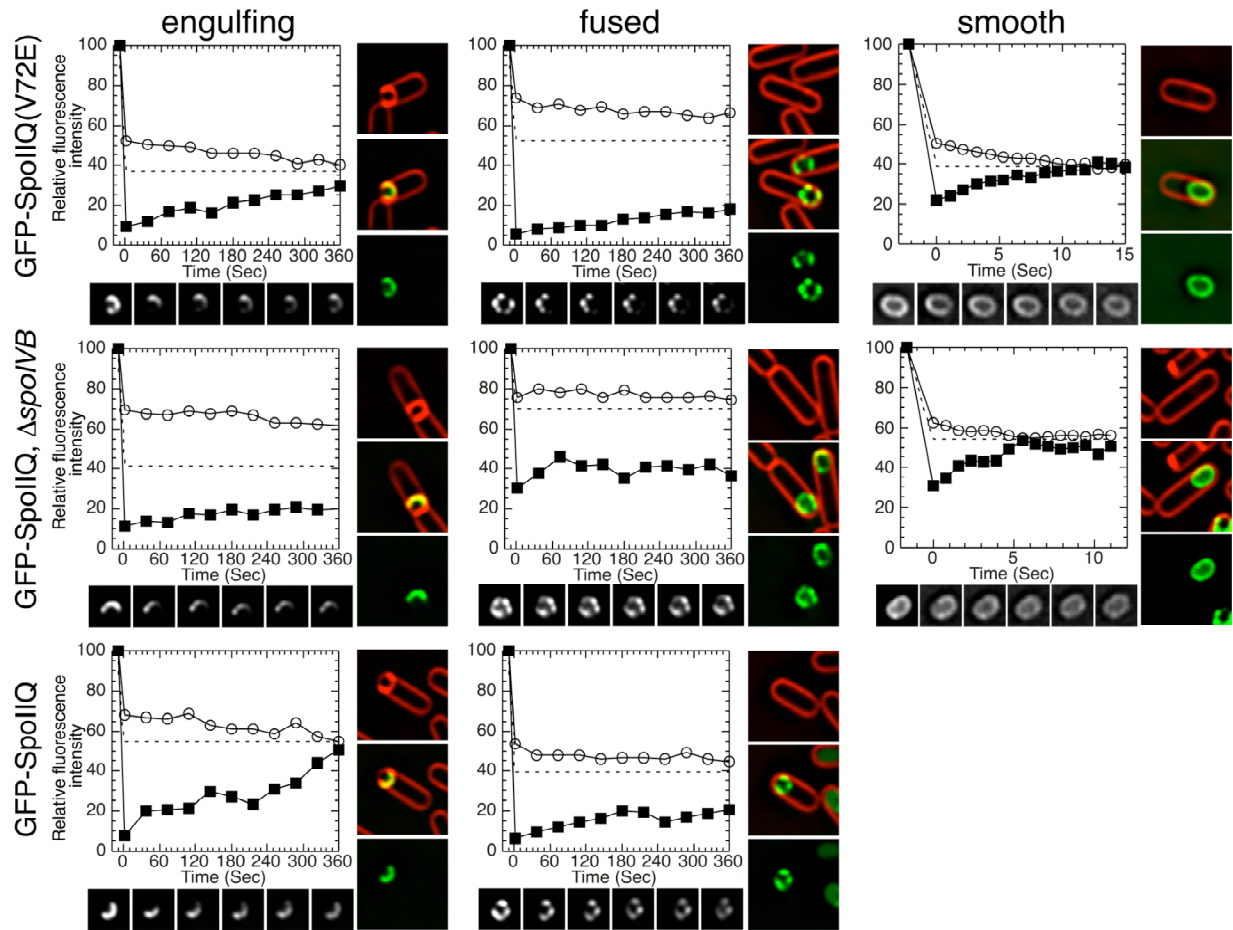

**Supplemental Fig 2.** FRAP analysis of GFP-SpoIIQ in the presence and the absence of *spoIVB* and cleavage-defectiveV72Y mutant in engulfing and fused septa performed and quantified as described in Methods. Images of GFP (green) and FM 4-64 stained membrane (red) of bleached cells are to the right of each graph. Images below each plot show the GFP fluorescence during the experiment; the second panel shows the cell just after bleaching. Recovery kinetics were quantified and plotted to show the mean pixel intensity of the bleached (filled square) and unbleached (empty circle) regions and the theoretical pixel intensity value following equilibration between these regions (dashed line).

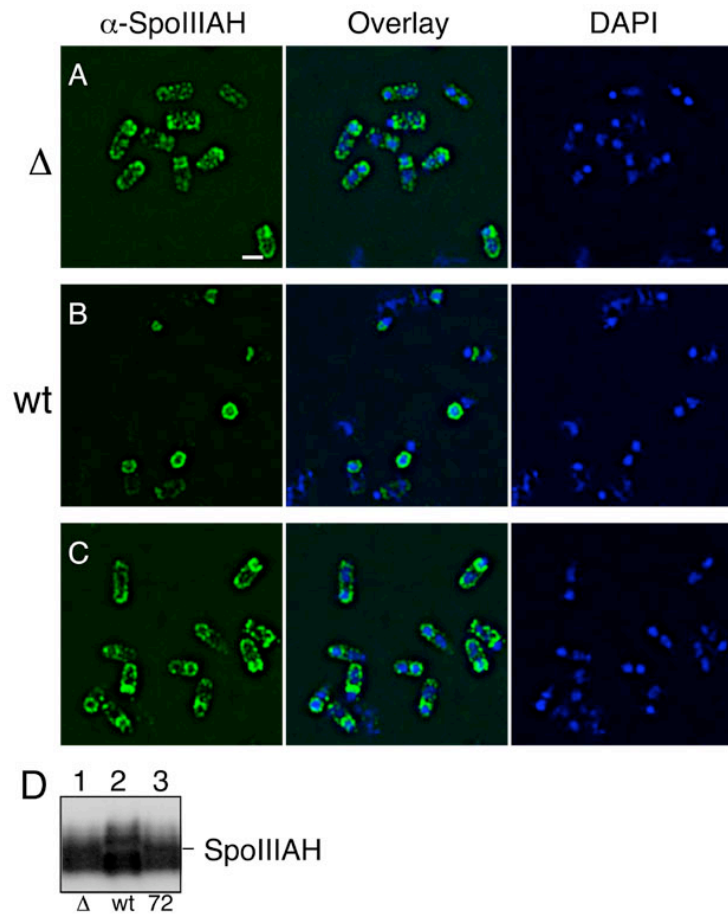

**Supplemental Fig 3.** Localization and accumulation level of SpoIIAH with  $spoIIQ^{l-72}$ . **(A-C)** Subcellular localization of SpoIIAH was examined by immunofluorescence using anti-SpoIIAH polyclonal antiserum. SCB3 ( $\Delta spoIIQ$ ; A), SCB4 ( $spoIIQ^+$ ; B) and SCB74 ( $spoIIQ^{l-72}$ ; C) was sampled at  $t_{2.5}$  and probed by anti-SpoIIAH antiserum (green). **(D)** Cellular accumulation level of SpoIIAH (at  $t_{2.5}$ ) was examined by Western blotting by probing whole cell lysate from SCB3 ( $\Delta spoIIQ$ ; lane 1), SCB4 ( $spoIIQ^+$ ; lane 2) and SCB74 ( $spoIIQ^{l-72}$ ; lane 3) with anti-SpoIIAH antiserum.

**Table S1: Plasmids used in these studies**

| Plasmid     | Insert                                                                                      | Reference  |
|-------------|---------------------------------------------------------------------------------------------|------------|
| pCH505      | <i>amyE::P<sub>spoIIQ</sub>spoIIQ<math>\Omega</math>cat</i>                                 | (1)        |
| pCH507      | <i>amyE::P<sub>spoIIQ</sub>gfp(<math>\Delta</math>2-6)-spoIIQ<math>\Omega</math>cat</i>     | This study |
| pCH510      | <i>amyE::P<sub>spoIIQ</sub>spoIIQ-his<sub>6</sub><math>\Omega</math>cat</i>                 | This study |
| pCH528      | <i>amyE::P<sub>spoIIQ</sub>spoIIQA62C<math>\Omega</math>cat</i>                             | This study |
| pCH530      | <i>amyE::P<sub>spoIIQ</sub>spoIIQD64C<math>\Omega</math>cat</i>                             | This study |
| pCH531      | <i>amyE::P<sub>spoIIQ</sub>spoIIQD68C<math>\Omega</math>cat</i>                             | This study |
| pCH532      | <i>amyE::P<sub>spoIIQ</sub>spoIIQV70C<math>\Omega</math>cat</i>                             | This study |
| pCH533      | <i>amyE::P<sub>spoIIQ</sub>spoIIQE71C<math>\Omega</math>cat</i>                             | This study |
| pCH534      | <i>amyE::P<sub>spoIIQ</sub>spoIIQV72C<math>\Omega</math>cat</i>                             | This study |
| pCH535      | <i>amyE::P<sub>spoIIQ</sub>spoIIQG73C<math>\Omega</math>cat</i>                             | This study |
| pCH538      | <i>amyE::P<sub>spoIIQ</sub>spoIIQV72R<math>\Omega</math>cat</i>                             | This study |
| pCH539      | <i>amyE::P<sub>spoIIQ</sub>spoIIQV72Y<math>\Omega</math>cat</i>                             | This study |
| pCH540      | <i>amyE::P<sub>spoIIQ</sub>spoIIQV72N<math>\Omega</math>cat</i>                             | This study |
| pCH541      | <i>amyE::P<sub>spoIIQ</sub>spoIIQV72S<math>\Omega</math>cat</i>                             | This study |
| pCH542      | <i>amyE::P<sub>spoIIQ</sub>spoIIQV72A<math>\Omega</math>cat</i>                             | This study |
| pCH543      | <i>amyE::P<sub>spoIIQ</sub>spoIIQV72I<math>\Omega</math>cat</i>                             | This study |
| pCH544      | <i>amyE::P<sub>spoIIQ</sub>spoIIQV72H<math>\Omega</math>cat</i>                             | This study |
| pCH545      | <i>amyE::P<sub>spoIIQ</sub>spoIIQV72K<math>\Omega</math>cat</i>                             | This study |
| pCH546      | <i>amyE::P<sub>spoIIQ</sub>spoIIQV72E<math>\Omega</math>cat</i>                             | This study |
| pCH547      | <i>amyE::P<sub>spoIIQ</sub>spoIIQV72M<math>\Omega</math>cat</i>                             | This study |
| pCH548      | <i>amyE::P<sub>spoIIQ</sub>spoIIQG73V<math>\Omega</math>cat</i>                             | This study |
| pCH549      | <i>amyE::P<sub>spoIIQ</sub>spoIIQG73E<math>\Omega</math>cat</i>                             | This study |
| pCH550      | <i>amyE::P<sub>spoIIQ</sub>spoIIQI-72<math>\Omega</math>cat</i>                             | This study |
| pCH551      | <i>amyE::P<sub>spoIIQ</sub>spoIIQG73L<math>\Omega</math>cat</i>                             | This study |
| pCH552      | <i>amyE::P<sub>spoIIQ</sub>spoIIQG73P<math>\Omega</math>cat</i>                             | This study |
| pCH553      | <i>amyE::P<sub>spoIIQ</sub>spoIIQG73T<math>\Omega</math>cat</i>                             | This study |
| pCH554      | <i>amyE::P<sub>spoIIQ</sub>spoIIQG73I<math>\Omega</math>cat</i>                             | This study |
| pCH555      | <i>amyE::P<sub>spoIIQ</sub>spoIIQG73S<math>\Omega</math>cat</i>                             | This study |
| pCH556      | <i>amyE::P<sub>spoIIQ</sub>spoIIQK74E<math>\Omega</math>cat</i>                             | This study |
| pCH557      | <i>amyE::P<sub>spoIIQ</sub>spoIIQK74I<math>\Omega</math>cat</i>                             | This study |
| pCH559      | <i>amyE::P<sub>spoIIQ</sub>spoIIQK74R<math>\Omega</math>cat</i>                             | This study |
| pCH560      | <i>amyE::P<sub>spoIIQ</sub>spoIIQK74A<math>\Omega</math>cat</i>                             | This study |
| pCH561      | <i>amyE::P<sub>spoIIQ</sub>spoIIQK74N<math>\Omega</math>cat</i>                             | This study |
| pCH562      | <i>amyE::P<sub>spoIIQ</sub>spoIIQK74S<math>\Omega</math>cat</i>                             | This study |
| pCH563      | <i>amyE::P<sub>spoIIQ</sub>spoIIQK74P<math>\Omega</math>cat</i>                             | This study |
| pCH564      | <i>amyE::P<sub>spoIIQ</sub>spoIIQK74D<math>\Omega</math>cat</i>                             | This study |
| pCH565      | <i>amyE::P<sub>spoIIQ</sub>spoIIQK74G<math>\Omega</math>cat</i>                             | This study |
| pCH574      | <i>amyE::P<sub>spoIIQ</sub>gfp(<math>\Delta</math>2-6)-spoIIQV72Y<math>\Omega</math>cat</i> | This study |
| pCH579      | <i>amyE::P<sub>spoIIQ</sub>gfp(<math>\Delta</math>2-6)-spoIIQV72E<math>\Omega</math>cat</i> | This study |
| pCH687      | <i>gst-spoIVFA-flag</i>                                                                     | This study |
| pCH689      | <i>gst-spoIIQV72A</i>                                                                       | This study |
| pCH690      | <i>gst-spoIIQV72M</i>                                                                       | This study |
| pGST-SpoIIQ | <i>gst-spoIIQ</i>                                                                           | (2)        |
| pZR53       | <i>spoIVB-His<sub>6</sub></i>                                                               | (3)        |

| <b>Table S2: Primers used in plasmid construction and mutagenesis</b> |                                                                           |
|-----------------------------------------------------------------------|---------------------------------------------------------------------------|
| <b>Name</b>                                                           | <b>Sequence</b>                                                           |
| SP1                                                                   | 5'-GCTGAGGTGATGAAACAATGGGATCCAAGCTTACTAGTAG-3'                            |
| SP2                                                                   | 5'-CAGAAGACACTGAACAGTCTCATCACCATCACCATCACTAA-TGAAGAAAACGTCTATC-3'         |
| SP3                                                                   | 5'-CAACGACGATGCAGTTGAANNNGGAAAGTCAATGGAAAAT-3'                            |
| SP4                                                                   | 5'-CGACGATGCAGTTGAAGTANNNAAGTCAATGGAAAATGTC-3'                            |
| SP5                                                                   | 5'-CGATGCAGTTGAAGTAGGANNNTCAATGGAAAATGTTCGCA-3'                           |
| SP6                                                                   | 5'-ATGTCATGGATCCATTAAGTCATTTTTTCGGAGTA-3'                                 |
| SP7                                                                   | 5'-CGTACGTGGATCCTTATTCAAATGAAATCACCTGA-3'                                 |
| SP8                                                                   | 5'-TTCAGGTGATTTTCAATTTGAAGACTATAAAGACGACGACGAC-AAATAAGGATCCGATCAGACCAG-3' |
| SP9                                                                   | 5'-ATTGGACCCGTCAGTCAGGGATCCATTAACCCGCCGTAGCC-3'                           |
| SP10                                                                  | 5'-TGATAACGGCGGAAACTCCTGTTATGACAACAACGACGAT-3'                            |
| SP11                                                                  | 5'-CGGCGGAAACTCCGCATATTGCAACAACGACGATGCAGTT-3'                            |
| SP12                                                                  | 5'-CGCATATGACAACAACGACTGTGCAGTTGAAGTAGGAAAG-3'                            |
| SP13                                                                  | 5'-TGACAACAACGACGATGCATGTGAAGTAGGAAAGTCAATG-3'                            |
| SP14                                                                  | 5'-CAACAACGACGATGCAGTTTGTGTAGGAAAGTCAATGGAA-3'                            |
| SP15                                                                  | 5'-CAACGACGATGCAGTTGAATGTGGAAAGTCAATGGAAAAT-3'                            |
| SP16                                                                  | 5'-CGACGATGCAGTTGAAGTATGTAAGTCAATGGAAAATGTC-3'                            |
| SP17                                                                  | 5'-CGATGCAGTTGAAGTAGGATGTTCAATGGAAAATGTTCGCA-3'                           |

Either A, T, G or C appears randomly at the position shown by N.

### Supplemental references

1. Jiang, X., Rubio, A., Chiba, S., and Pogliano, K. (2005) *Mol Microbiol* **58**, 102-115
2. Blaylock, B., Jiang, X., Rubio, A., Moran, C. P., Jr., and Pogliano, K. (2004) *Genes Dev* **18**, 2916-2928
3. Zhou, R., and Kroos, L. (2005) *Mol Microbiol* **58**, 835-846
